# Supplementary material for: Combining Exosomes Derived from Immature DCs with Donor Antigen-Specific Treg Cells Induces Tolerance in a Rat Liver Allograft Model
Source: Sci Rep. 2016 Sep 19;6:32971. doi: 10.1038/srep32971 (PMC5027549; doi:10.1038/srep32971)
Supplement: Supplementary Information [file srep32971-s1.pdf]

## Supplementary Information

# Combining Exosomes Derived from Immature DCs with Donor Antigen-Specific Treg Cells Induces Tolerance in a Rat Liver Allograft Model

Ben Ma<sup>1△</sup>, Jing-Yue Yang<sup>2△</sup>, Wen-jie Song<sup>1△</sup>, Rui Ding<sup>1△</sup>, Zhuo-chao Zhang<sup>1</sup>, Hong-chen Ji<sup>1</sup>, Xuan Zhang<sup>1</sup>, Jian-lin Wang<sup>1</sup>, Xi-sheng Yang<sup>1</sup>, Kai-shan Tao<sup>1\*</sup>, Ke-feng Dou<sup>1\*</sup>, Xiao Li<sup>1\*</sup>

1 Department of Hepatobiliary Surgery, Xijing Hospital, Fourth Military Medical University, Xi'an, Shaanxi Province, China.

2 Department of Clinical Oncology, Xijing Hospital, Fourth Military Medical University, Xi'an, Shaanxi Province, China

△ These authors contributed equally to this work.

Correspondence should be addressed to XL (lixiao0076@163.com), K-F D (gdwkgwx@fmmu.edu.cn) or K-S T (taokaishan0686@163.com).

The authors declare no competing financial interest.

**Supplementary Table. S1. Phenotypic features of different fractions of isolated T cells**

| Sample  | % CD4 <sup>+</sup> CD25 <sup>+</sup> | % CD4 <sup>+</sup> CD25 <sup>+</sup> FOXP3 <sup>+</sup> | % CD4/CD25/CD127 |
|---------|--------------------------------------|---------------------------------------------------------|------------------|
| A1      | 91                                   | 69.4                                                    | 14.9             |
| A2      | 83.5                                 | 63.1                                                    | 10.1             |
| A3      | 92.9                                 | 73.1                                                    | 13.7             |
| MST/SEM | 89.1±2.9                             | 68.5±2.9                                                | 12.9±1.4         |
| B1      | 92.2                                 | 88.2                                                    | 7.1              |
| B2      | 87.8                                 | 81.3                                                    | 5.5              |
| B3      | 93.1                                 | 91.3                                                    | 9.1              |
| MST/SEM | 91.0±1.6                             | 86.9±3.0                                                | 7.2±1.0          |
| Sample  | % CD8 <sup>+</sup>                   |                                                         |                  |
| C1      | 88.7                                 |                                                         |                  |
| C2      | 84.9                                 |                                                         |                  |
| C3      | 93.8                                 |                                                         |                  |
| MST/SEM | 89.1±2.6                             |                                                         |                  |

Samples A: fresh isolated CD4<sup>+</sup>CD25<sup>+</sup> T cells  
Samples B: donor SDCs co-cultured CD4<sup>+</sup>CD25<sup>+</sup> T cells  
Samples C: isolated CD8a<sup>+</sup> T cells

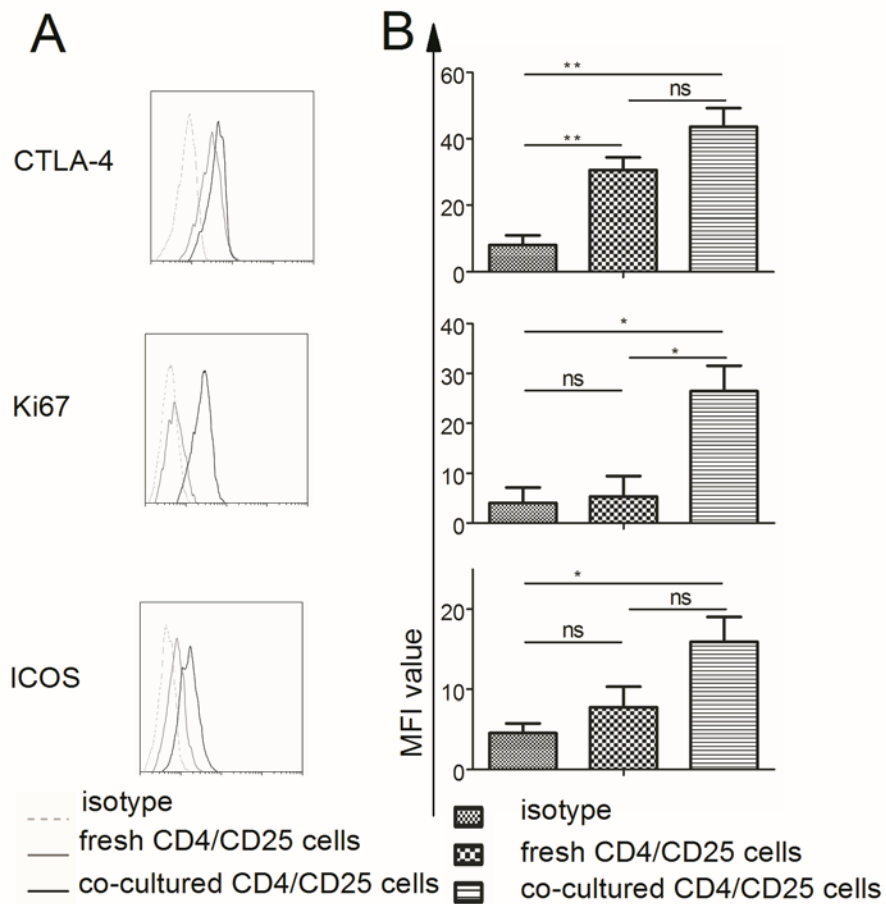

**Supplementary Fig. S1. Additional phenotype identification of Treg.** (A) To further identify the status of two fraction of Treg (fresh isolated Tregs and Tregs co-cultured with donor SDCs), we detected the expression of CTLA-4, Ki67 and ICOS with FCM. One representative result of three is shown. (B) Mean fluorescence intensity (MFI) was analysed. Ki67 expression was higher in co-cultured Tregs than fresh isolated Tregs,  $p < 0.05$ ,  $n = 3$ . \* indicates  $p < 0.05$ ; \*\* indicates  $p < 0.01$ ; ns indicates no significant difference.

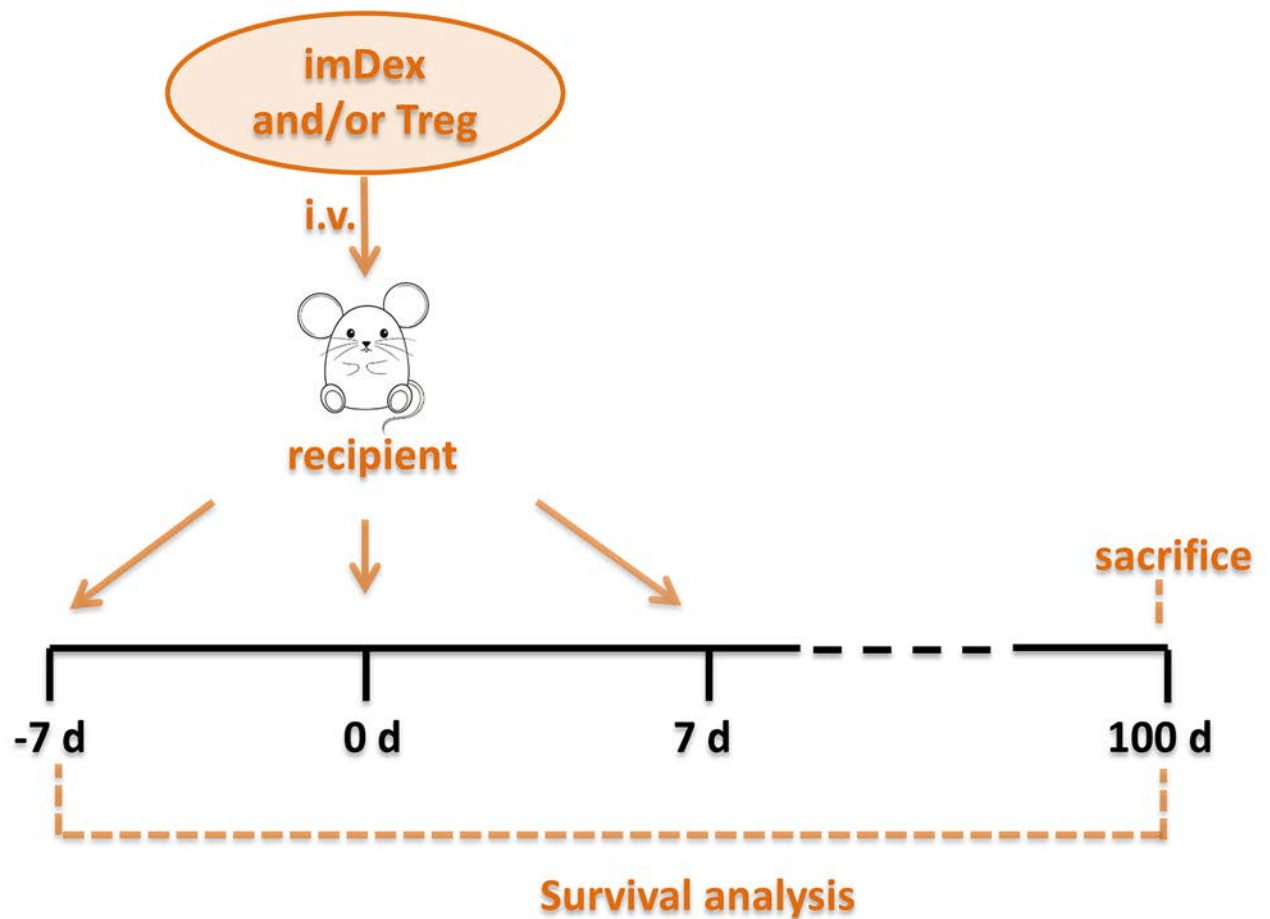

**Supplementary Fig. S2. Process diagram of survival analysis in fig. 3.**

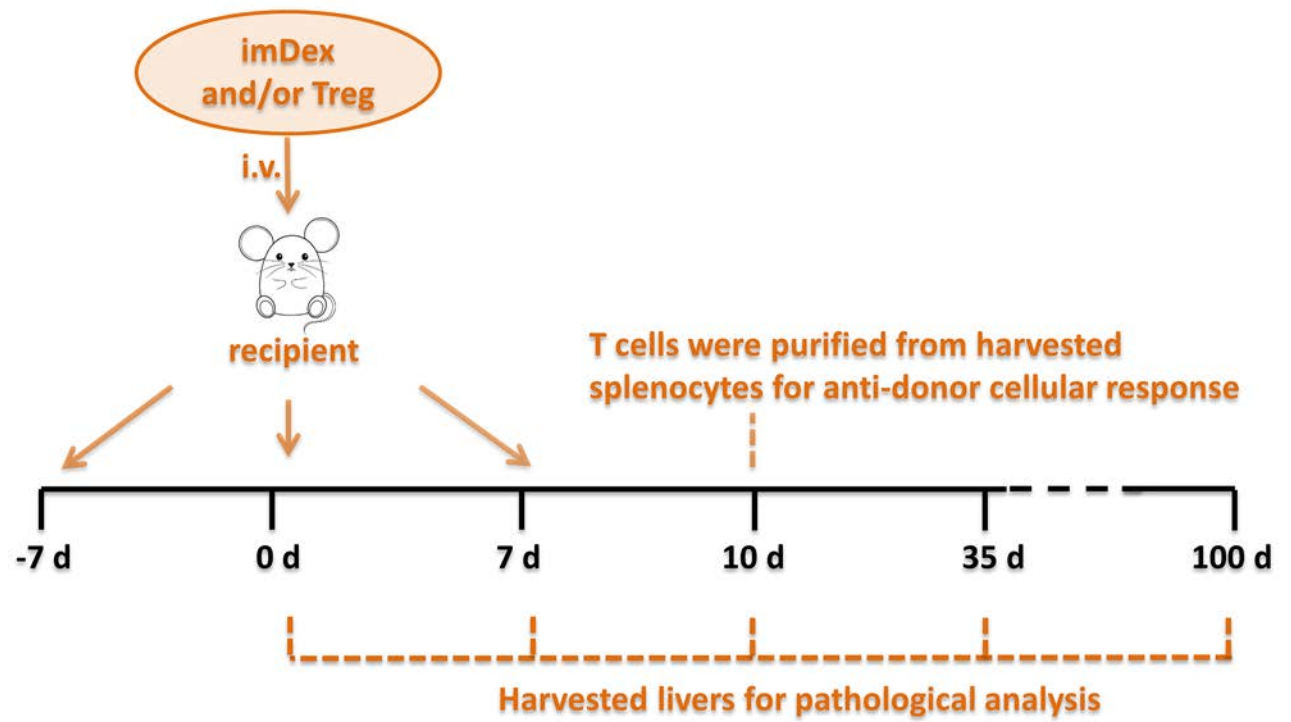

Supplementary Fig. S3. Process diagram of anti-donor cell response analysis and pathological analysis in fig. 4/5.

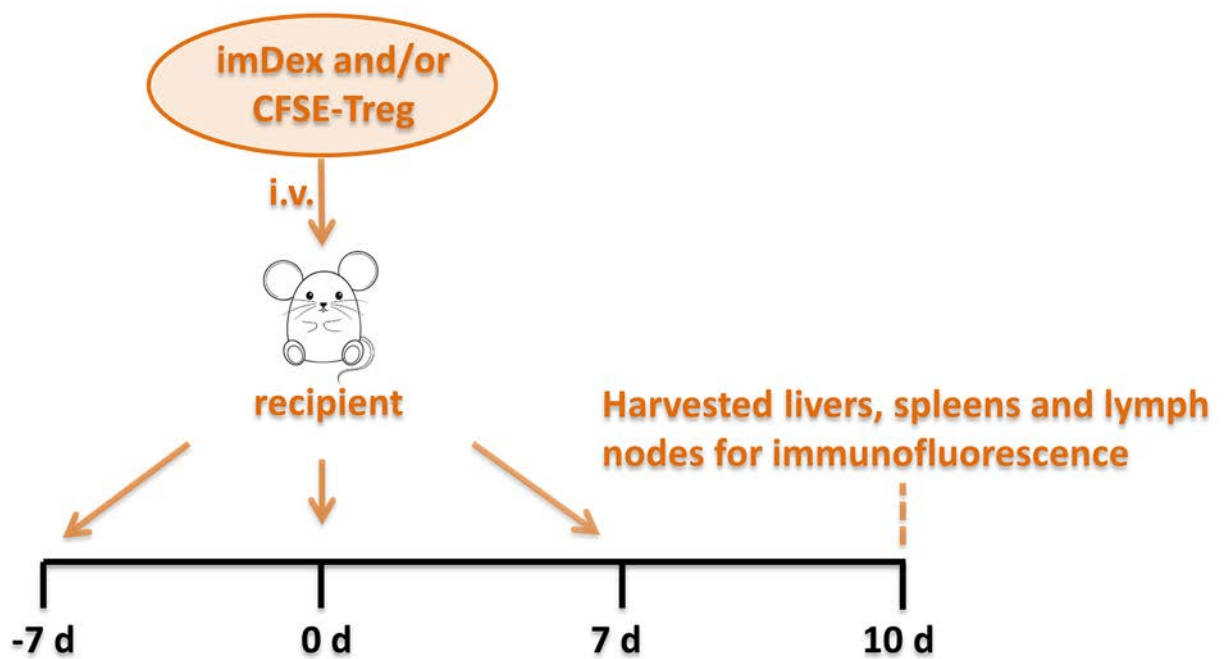

Supplementary Fig. S4. Process diagram of immunofluorescence analysis in fig. 6.

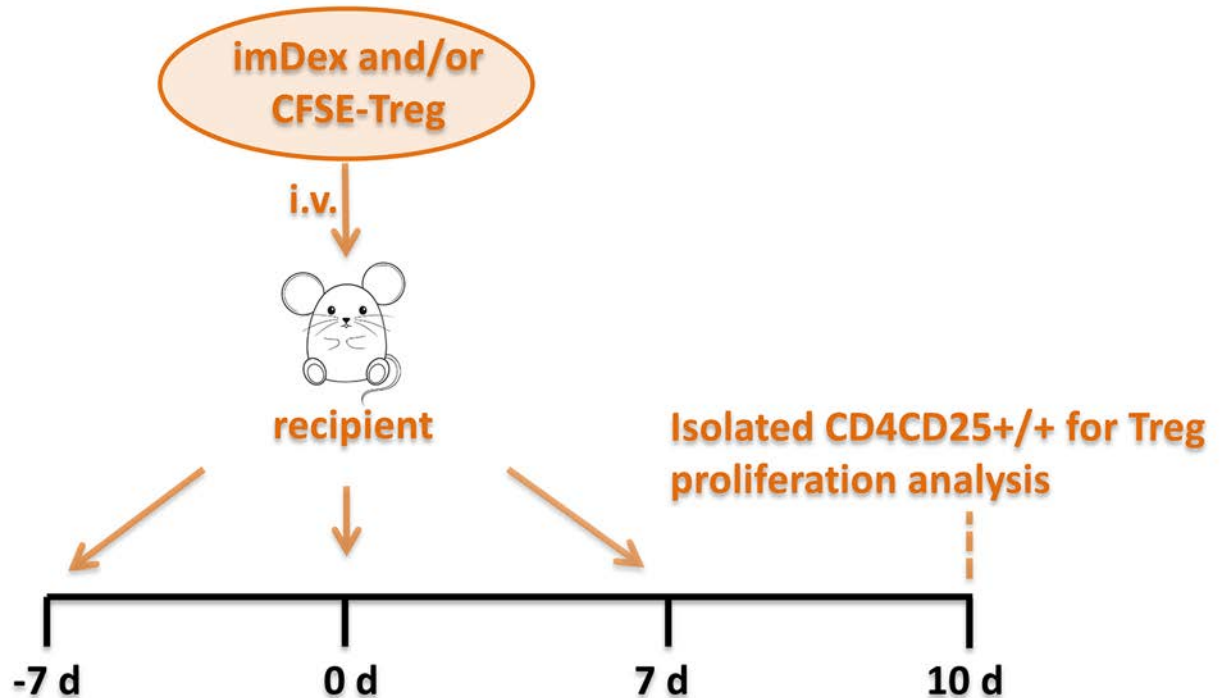

Supplementary Fig. S5. Process diagram of donor-specific Treg proliferation assays in vivo in fig. 7.
